# Supplementary material
Source: PubMed Central journal article supplement (PMC1681482)
Supplement: msb4100050-s3.pdf [file msb4100050-s3.pdf]

Supplementary Table 1. Derivation of *E. coli* K-12 BW25113

| Name                 | Genotype                                                                                                                 | Pedigree                                       | Source <sup>a</sup>                                                                                                            | Source                       |
|----------------------|--------------------------------------------------------------------------------------------------------------------------|------------------------------------------------|--------------------------------------------------------------------------------------------------------------------------------|------------------------------|
| BD792                | <i>rpoS396(Am) rph-1</i>                                                                                                 | W1485                                          | CGSC6159 from B. Bachmann                                                                                                      | (Wanner, 1983)               |
| BW21597              | DE <i>phoR574 rpoS396(Am) rph-1</i>                                                                                      | BD792                                          | Tc <sup>R</sup> with pAH14 then Tc <sup>S</sup> for Pho <sup>-</sup> (Haldimann et al., 1997)                                  | unpublished                  |
| BW21652              | DE <i>phoR574 DE(creABCD)154 rpoS396(Am) rph-1</i>                                                                       | BD792 via BW21597                              | Tc <sup>R</sup> with pSK26 then Tc <sup>S</sup> for Cre- (Metcalf et al., 1996)                                                | unpublished                  |
| BW23186              | DE <i>phoR574 DE(creABCD)154 rpoS396(Am) DE(araBAD)567 rph-1</i>                                                         | BD792 via BW21652                              | Tc <sup>R</sup> with pAH54 then Tc <sup>S</sup> for Ara <sup>-</sup> (Haldimann et al., 1998)                                  | unpublished                  |
| BW23599              | <i>rrnB3 DELacZ4787 proC::Tn5-132 DE(creABCD)154 rpoS396(Am) DE(araBAD)567 rph-1</i>                                     | BD792 via BW23186                              | Tc <sup>R</sup> , Pro <sup>-</sup> , Lac <sup>-</sup> , Pho <sup>+</sup> with P1 <i>kc</i> on BW22773 (Haldimann et al., 1998) | unpublished                  |
| BW23660              | <i>rrnB3 DELacZ4787 DE(phoBR)580 DE(creABCD)154 rpoS396(Am) DE(araBAD)567 rph-1</i>                                      | BD792 via BW23599                              | Pro <sup>+</sup> , Pho <sup>-</sup> with P1 <i>kc</i> on BW23316                                                               | (Haldimann et al., 1997)     |
| BW24200              | <i>rrnB3 DELacZ4787 DE(phoBR)580 DE(creABCD)154 rpoS396(Am) DE(araBAD)567 metF159(Am) zii-510::Tn10 rph-1</i>            | BD792 via BW23660 (Haldimann et al., 1997)     | Tc <sup>R</sup> , Met <sup>-</sup> with P1 <i>kc</i> on JW383 (Haldimann et al., 1997)                                         | unpublished                  |
| BW24201              | <i>rrnB3 DELacZ4787 DE(phoBR)580 DE(creABCD)154 rpoS396(Am) DE(araBAD)567 DE(rhaBAD)568 rph-1</i>                        | BD792 via BW24200                              | Met <sup>+</sup> , Tc <sup>S</sup> , Rha <sup>-</sup> with P1 <i>kc</i> on BW22875 (Haldimann et al., 1998)                    | unpublished                  |
| BW24310              | <i>rrnB3 DELacZ4787 DE(phoBR)580 DE(creABCD)154 rpoS396(Am) DE(araBAD)567 DE(rhaBAD)568 cysC95::Tn10 rpoS::kan rph-1</i> | BD792 via BW24201                              | Tc <sup>R</sup> , Km <sup>R</sup> with P1 <i>kc</i> on ZK1001 (Haldimann et al., 1998)                                         | (Haldimann and Wanner, 2001) |
| BW24320 <sup>b</sup> | <i>rrnB3 DELacZ4787 DE(phoBR)580 DE(creABCD)154 DE(araBAD)567 DE(rhaBAD)568 rph-1</i>                                    | BD792 via BW24310 (Haldimann and Wanner, 2001) | Cys <sup>+</sup> , Km <sup>S</sup> with P1 <i>kc</i> on MG1655 (Wanner and Boline, 1990)                                       | (Haldimann and Wanner, 2001) |
| BW24353              | <i>rrnB3 DELacZ4787 DE(phoBR)580 DE(zaa trpR creABCD arcA thr)104::Tn5-132 DE(araBAD)567 DE(rhaBAD)568 rph-1</i>         | BD792 via BW24320 (Haldimann and Wanner, 2001) | Tc <sup>R</sup> , Thr <sup>-</sup> with P1 <i>kc</i> on BW12070 (Fisher et al., 1995)                                          | unpublished                  |
| BW24476              | <i>rrnB3 DELacZ4787 DE(phoBR)580 hsdR514 DE(araBAD)567 DE(rhaBAD)568 rph-1</i>                                           | BD792 via BW24353                              | Thr <sup>+</sup> , HsdR <sup>-</sup> with P1 <i>kc</i> on BW24447 (Stern et al., 1999)                                         | (Stern et al., 1999)         |
| BW25083              | <i>rrnB3 DELacZ4787 proC::Tn5-132 hsdR514 DE(araBAD)567 DE(rhaBAD)568 rph-1</i>                                          | BD792 via BW24476 (Stern et al., 1999)         | Tc <sup>R</sup> , Pro <sup>-</sup> , Pho <sup>+</sup> with P1 <i>kc</i> on BW22773 (Haldimann et al., 1998)                    | (Haldimann and Wanner, 2001) |

Supplementary Table 1. continued

| Name                 | Genotype                                                                                                 | Pedigree                                                   | Source <sup>a</sup>                                                                 | Reference                                                 |
|----------------------|----------------------------------------------------------------------------------------------------------|------------------------------------------------------------|-------------------------------------------------------------------------------------|-----------------------------------------------------------|
| BW25113 <sup>c</sup> | <i>rrnB3</i> DEL <i>acZ4787 hsdR514</i><br>DE( <i>araBAD</i> )567 DE( <i>rhaBAD</i> )568<br><i>rph-1</i> | BD792 via<br>BW25083<br>(Haldimann<br>and Wanner,<br>2001) | Pro <sup>+</sup> with P1 <i>kc</i> on<br>BW24321<br>(Haldimann and<br>Wanner, 2001) | (Lessard et al.,<br>1998;Datsenko<br>and Wanner,<br>2000) |

<sup>a</sup>Tc<sup>R</sup>, tetracycline-resistant; Tc<sup>S</sup>, tetracycline-sensitive; Km<sup>R</sup>, kanamycin-resistant.

<sup>b</sup>BW24320 and its descendents carry the same pseudorevertant *rpoS*(Q33) allele as MG1655 (Hayashi et al., 2005)

<sup>c</sup>We recently discovered that BW25113, like its immediate ancestors, is *lacI*<sup>+</sup> and not *lacI*<sup>f</sup>, as had been previously reported (Lessard et al., 1998;Datsenko and Wanner, 2000;Haldimann and Wanner, 2001;Khlebnikov et al., 2001;Zhou et al., 2003;Ismail et al., 2003;Zhou et al., 2004).

## References

- Datsenko KA, Wanner BL (2000) One-step inactivation of chromosomal genes in *Escherichia coli* K-12 using PCR products. *Proc Natl Acad Sci USA* 97:6640-6645
- Fisher SL, Jiang W, Wanner BL, Walsh CT (1995) Cross-talk between the histidine protein kinase VanS and the response regulator PhoB: characterization and identification of a VanS domain that inhibits activation of PhoB. *J Biol Chem* 270:23143-23149
- Haldimann A, Daniels LL, Wanner BL (1998) Use of new methods for construction of tightly regulated arabinose and rhamnose promoter fusions in studies of the *Escherichia coli* phosphate regulon. *J Bacteriol* 180:1277-1286
- Haldimann A, Fisher SL, Daniels LL, Walsh CT, Wanner BL (1997) Transcriptional regulation of the *Enterococcus faecium* BM4147 vancomycin resistance gene cluster by the VanS-VanR two-component regulatory system in *Escherichia coli*. *J Bacteriol* 179:5903-5913
- Haldimann A, Wanner BL (2001) Conditional-replication, integration, excision, and retrieval plasmid-host systems for gene structure-function studies in bacteria. *J Bacteriol* 183:6384-6393
- Hayashi K, Morooka N, Yamamoto Y, Fujita K, Isono K, Choi S, Ohtsubo E, Baba T, Wanner BL, Mori H, Horiuchi T (2005) Highly accurate genome sequences of the *Escherichia coli* K-12 strains MG1655 and W3110. *Molecular Systems Biology* MSB-05-095:
- Ismail W, Mohamed MES, Wanner BL, Datsenko KA, Eisenreich W, Rohdich F, Bacher A, Fuchs G (2003) Functional genomics by NMR spectroscopy. Phenylacetate catabolism in *Escherichia coli*. *J Biol Chem*
- Khlebnikov A, Datsenko KA, Skaug T, Wanner BL, Keasling JD (2001) Homogeneous expression of the *P<sub>BAD</sub>* promoter in *Escherichia coli* by constitutive expression of the low-affinity high-capacity AraE transporter. *Microbiol* 147:3241-3247
- Lessard IAD, Pratt SD, McCafferty DG, Bussiere DE, Hutchins C, Wanner BL, Katz L, Walsh CT (1998) Homologs of the vancomycin resistance D-ala-D-ala dipeptidase VanX in *Streptomyces toyocaensis*, *Escherichia coli*, and *Synechocystis*: Attributes of catalytic efficiency, stereoselectivity, and regulation with implications for function. *Chemistry & Biology* 5:489-504
- Metcalf WW, Jiang W, Daniels LL, Kim S-K, Haldimann A, Wanner BL (1996) Conditionally replicative and conjugative plasmids carrying *lacZα* for cloning, mutagenesis, and allele replacement in bacteria. *Plasmid* 35:1-13
- Stern RJ, Lee T-Y, Lee T-J, Yan W, Scherman MS, Vissa VD, Kim S-K, Wanner BL, McNeil MR (1999) Conversion of dTDP-4-keto-6-deoxyglucose to free dTDP-4-keto-rhamnose by the *rmlC* products of *Escherichia coli* and *Mycobacterium tuberculosis*. *Microbiol* 145:663-671
- Wanner BL (1983) Overlapping and separate controls on the phosphate regulon in *Escherichia coli* K-12. *J Mol Biol* 166:283-308
- Wanner BL, Boline JA (1990) Mapping and molecular cloning of the *phn* (*psiD*) locus for phosphonate utilization in *Escherichia coli*. *J Bacteriol* 172:1186-1196
- Zhou L, Kim S-K, Avramova L, Datsenko KA, Wanner BL (2003) Use of Conditional-replication, integration, and modular CRIM plasmids to make single-copy *lacZ* fusions. In: Blot, M. (ed) *Methods and Tools in Biosciences and Medicine. Prokaryotic Genomics*. Birkhäuser Verlag, Basel, Switzerland, pp 65-89
- Zhou L, Zhang K, Wanner BL (2004) Chromosomal expression of foreign and native genes from regulatable promoters in *E. coli*. *Methods in Molecular Biology* 267:123-134
