# Supplementary material
Source: PubMed Central journal article supplement (PMC1681482)

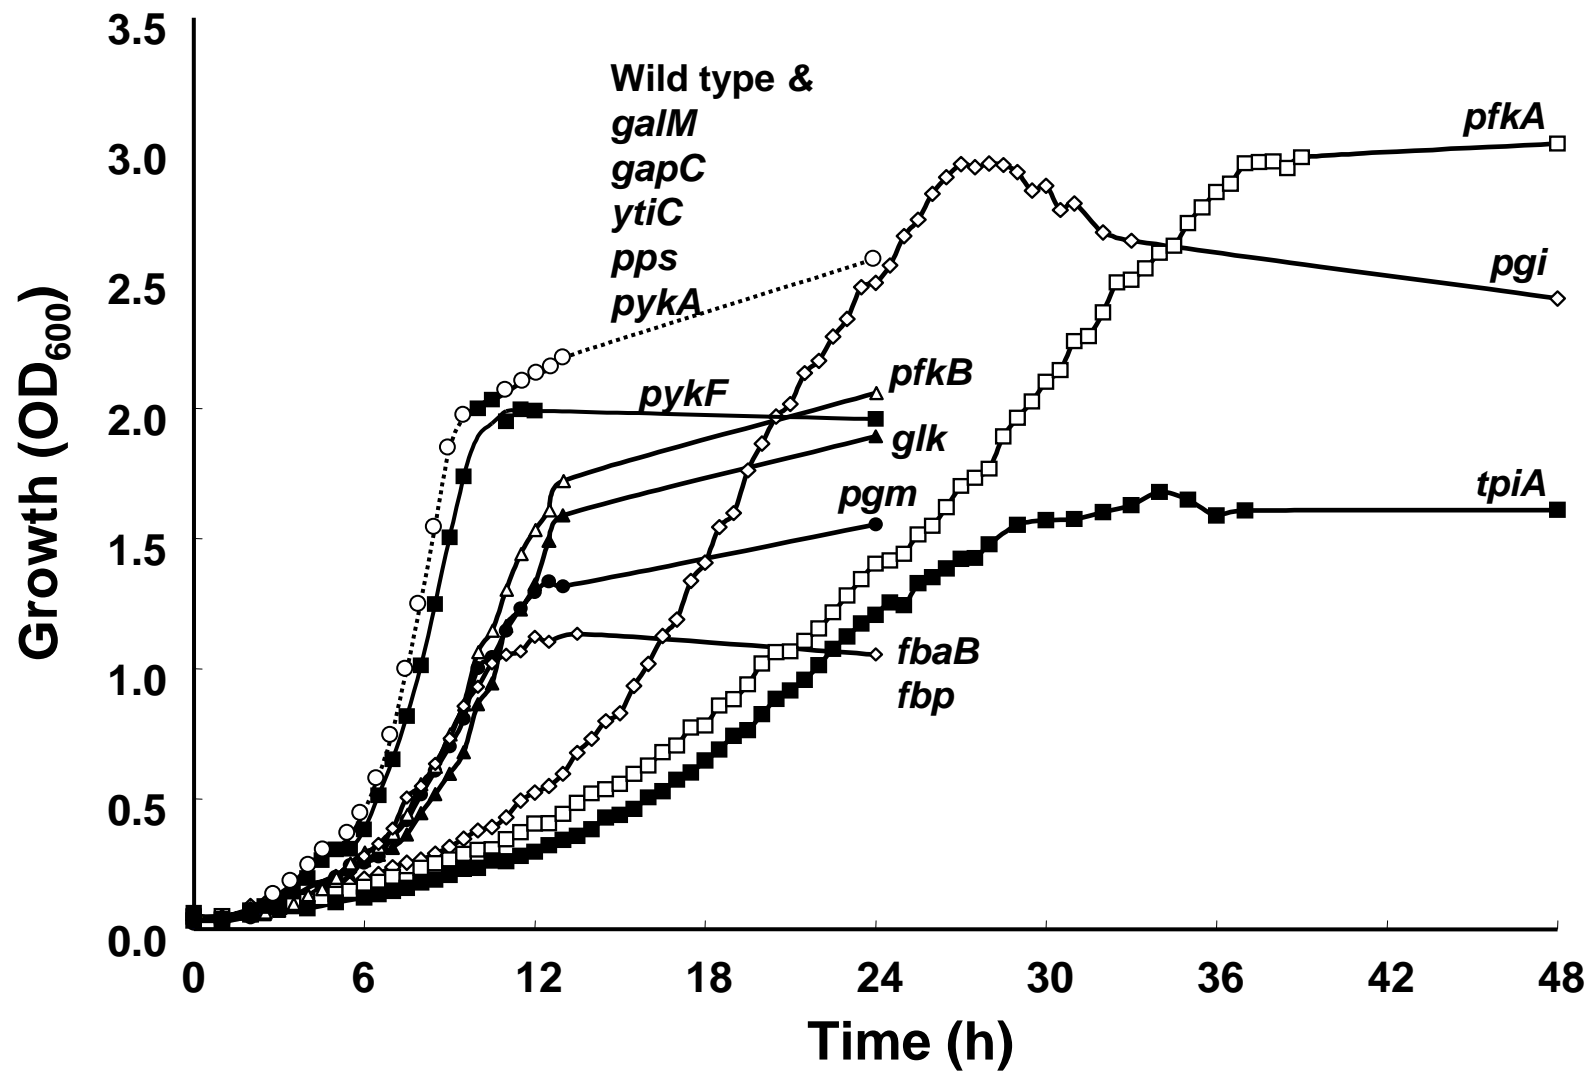

Supplement: msb4100050-s1.pdf [file msb4100050-s1.pdf]
